# Supplementary material
Source: PubMed Central journal article supplement (PMC6726976)
Supplement: ajcr0009-1622-f9.pdf [file ajcr0009-1622-f9.pdf]

EPS8 regulates cell proliferation in MM

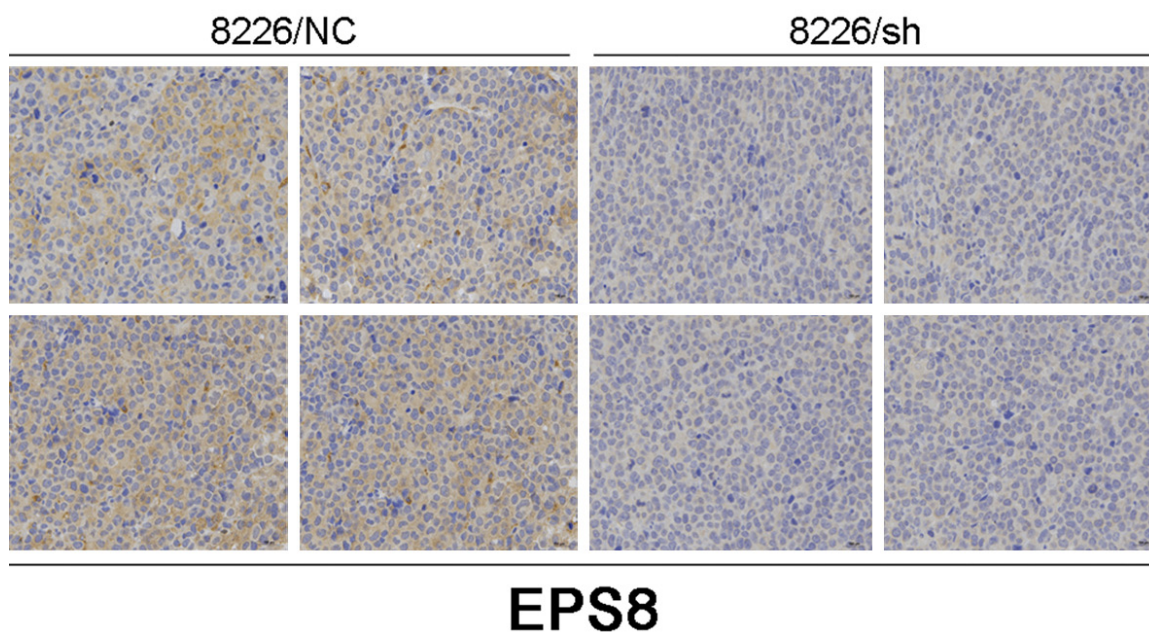

**Figure S1.** Immunohistochemistry for tumor sections were used for EPS8 assessment.

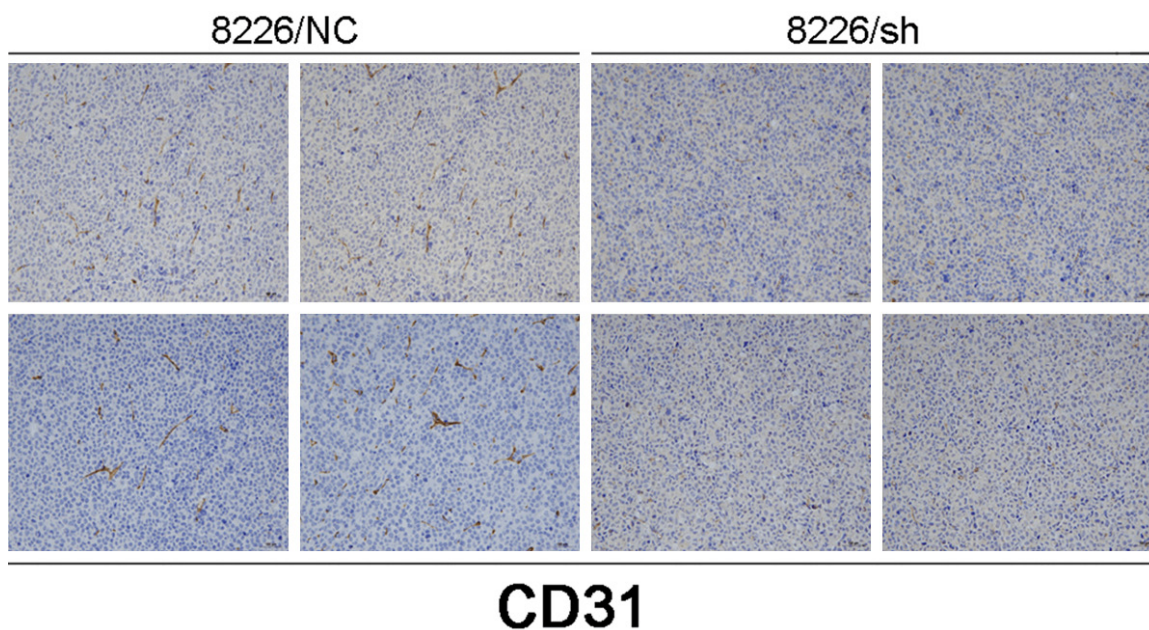

**Figure S2.** Immunohistochemistry for tumor sections were used for CD31/MVD assessment.
